# Supplementary material
Source: Elsevier journal article supplement (https://www.sciencedirect.com/science/article/pii/S157518132030005X)
Supplement: mmc1 [file S157518132030005X:mmc1.pdf]

## ANEXO: Cuestionario de percepción del instrumento de evaluación mediante APROC. Dimensiones y sus ítems.

| DIMENSIÓN                        | DEFINICIÓN                                                                                                                                                     | ÍTEMS                                                                                                                                        |
|----------------------------------|----------------------------------------------------------------------------------------------------------------------------------------------------------------|----------------------------------------------------------------------------------------------------------------------------------------------|
| Validez Curricular               | Percepción del grado en que los ítems de la evaluación mediante APROC son relevantes para los objetivos de la asignatura.                                      | La evaluación mediante APROC es coherente con los resultados de aprendizaje planteados para mí en la asignatura.                             |
|                                  |                                                                                                                                                                | La evaluación mediante APROC midió mi capacidad para determinar la dimensión vertical de un paciente desdentado total.                       |
|                                  |                                                                                                                                                                | La evaluación mediante APROC midió mi capacidad para determinar la relación céntrica de un paciente desdentado total.                        |
|                                  |                                                                                                                                                                | La evaluación mediante APROC midió mi capacidad para ejecutar la ordenación dentaria anterior y/o posterior de un paciente desdentado total. |
| Validez Instruccional            | Percepción de la congruencia entre las oportunidades de aprendizaje clínico, la instrucción otorgada en destrezas clínicas y la evaluación mediante las APROC. | La evaluación mediante APROC incluye los procedimientos clínicos que he realizado en la asignatura.                                          |
|                                  |                                                                                                                                                                | Existe coherencia entre los niveles de supervisión de las APROC y lo que he realizado en la práctica clínica.                                |
|                                  |                                                                                                                                                                | La evaluación mediante APROC evalúa los procedimientos que he realizado durante la práctica clínica.                                         |
|                                  |                                                                                                                                                                | La evaluación mediante APROC evalúa los resultados obtenidos en los procedimientos que he realizado en la práctica clínica.                  |
| Estandarización de la evaluación | Percepción de estandarización, objetividad y transparencia de la evaluación mediante APROC.                                                                    | La evaluación mediante APROC permite una evaluación objetiva.                                                                                |
|                                  |                                                                                                                                                                | He comprendido cada nivel de supervisión utilizado en la evaluación mediante APROC de forma precisa.                                         |
|                                  |                                                                                                                                                                | Si se me evaluara nuevamente utilizando APROC en la misma situación, tendría los mismos resultados.                                          |
|                                  |                                                                                                                                                                | Conocí los objetivos de la evaluación mediante APROC de forma previa.                                                                        |
| Aceptación de la evaluación      | Percepción de aceptación de la evaluación porque se le considera adecuada.                                                                                     | Me gustaría que las APROC fueran incluidas como método de evaluación en esta asignatura.                                                     |
|                                  |                                                                                                                                                                | Las APROC son aplicables a mi quehacer clínico.                                                                                              |
|                                  |                                                                                                                                                                | Las APROC midieron adecuadamente mis logros en la clínica.                                                                                   |
|                                  |                                                                                                                                                                | La evaluación mediante APROC fue concordante al trabajo que realizo en clínica.                                                              |
| Factibilidad de la evaluación    | Percepción de la factibilidad de evaluar utilizando APROC.                                                                                                     | El tiempo asignado fue suficiente para desarrollar la evaluación mediante APROC.                                                             |
|                                  |                                                                                                                                                                | El docente se encontraba capacitado para llevar a cabo la evaluación mediante APROC.                                                         |
|                                  |                                                                                                                                                                | El docente demostró dominio de la evaluación mediante APROC.                                                                                 |
|                                  |                                                                                                                                                                | La evaluación mediante APROC me pareció un proceso simple.                                                                                   |

| DIMENSIÓN                  | DEFINICIÓN                                                                                         | ÍTEMS                                                                                                                                   |
|----------------------------|----------------------------------------------------------------------------------------------------|-----------------------------------------------------------------------------------------------------------------------------------------|
| Impacto Educativo          | Percepción de la utilidad de la evaluación con APROC como fuente de aprendizaje.                   | La evaluación mediante APROC fue una instancia de aprendizaje favorable.                                                                |
|                            |                                                                                                    | El uso de APROC como evaluación es beneficioso para mi formación profesional.                                                           |
|                            |                                                                                                    | La evaluación mediante APROC me motivó a aprender más.                                                                                  |
|                            |                                                                                                    | La evaluación mediante APROC facilitó que hiciera una autoevaluación de mi trabajo clínico.                                             |
| Retroalimentación Efectiva | Percepción de la retroalimentación efectiva generada a través de la evaluación mediante APROC.     | La evaluación mediante APROC facilitó que realizara un análisis efectivo de los resultados de mi práctica clínica junto con el docente. |
|                            |                                                                                                    | La retroalimentación entregada mediante APROC resultó beneficiosa para mi aprendizaje.                                                  |
|                            |                                                                                                    | Luego de mi evaluación mediante APROC comprendí lo que debo modificar para mejorar mi práctica clínica.                                 |
|                            |                                                                                                    | La retroalimentación posterior a mi evaluación mediante APROC resultó constructiva para mi formación profesional.                       |
| Dominio Cognitivo          | Percepción de la capacidad de las APROC para evaluar conocimiento y comprensión de los contenidos. | La evaluación mediante APROC evaluó adecuadamente mis conocimientos teóricos de la asignatura.                                          |
|                            |                                                                                                    | La evaluación mediante APROC evaluó mi razonamiento clínico.                                                                            |
|                            |                                                                                                    | La evaluación mediante APROC evaluó mi capacidad para resolver problemas clínicos.                                                      |
|                            |                                                                                                    | La evaluación mediante APROC permitió hacer un juicio adecuado sobre los conocimientos que he adquirido en la asignatura.               |
| Dominio Procedimental      | Percepción de la capacidad de las APROC para evaluar procedimientos, conductas o habilidades.      | La evaluación mediante APROC evaluó mis destrezas procedimentales.                                                                      |
|                            |                                                                                                    | La evaluación mediante APROC evaluó mis habilidades clínicas.                                                                           |
|                            |                                                                                                    | La evaluación mediante APROC me permitió aplicar los procedimientos evaluados a situaciones clínicas nuevas.                            |
|                            |                                                                                                    | La evaluación mediante APROC evaluó mi toma de decisiones durante el procedimiento.                                                     |
| Dominio Actitudinal        | Percepción de la capacidad de las APROC para evaluar el desarrollo emocional y social.             | La evaluación mediante APROC evaluó mis actitudes durante la práctica clínica.                                                          |
|                            |                                                                                                    | La evaluación mediante APROC evaluó mis habilidades de comunicación.                                                                    |
|                            |                                                                                                    | La evaluación mediante APROC evaluó mi responsabilidad para el ejercicio profesional.                                                   |
|                            |                                                                                                    | La evaluación mediante APROC evaluó mis valores para el ejercicio profesional.                                                          |
